# Supplementary material for: Extent, intensity and drivers of mammal defaunation: a continental-scale analysis across the Neotropics
Source: PubMed Central journal article supplement (PMC7492218; doi:10.1038/s41598-020-72010-w), 2020-09-15
Supplement: 41598_2020_72010_MOESM8_ESM.pdf [file 41598_2020_72010_MOESM8_ESM.pdf]

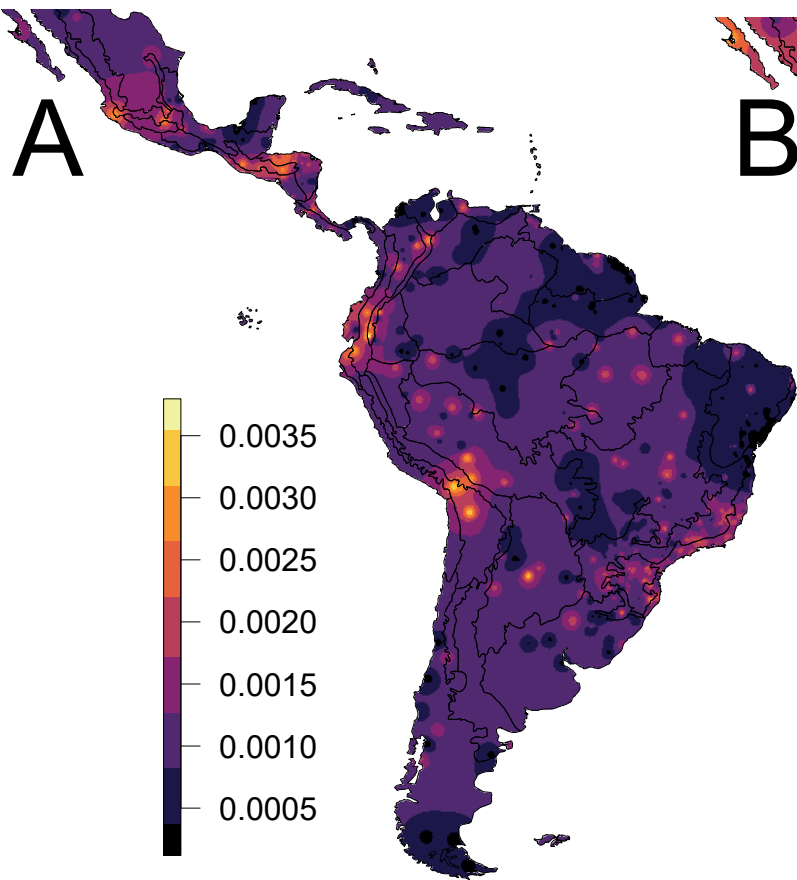

Bayes posteriori probability  
(HPI evaluation)

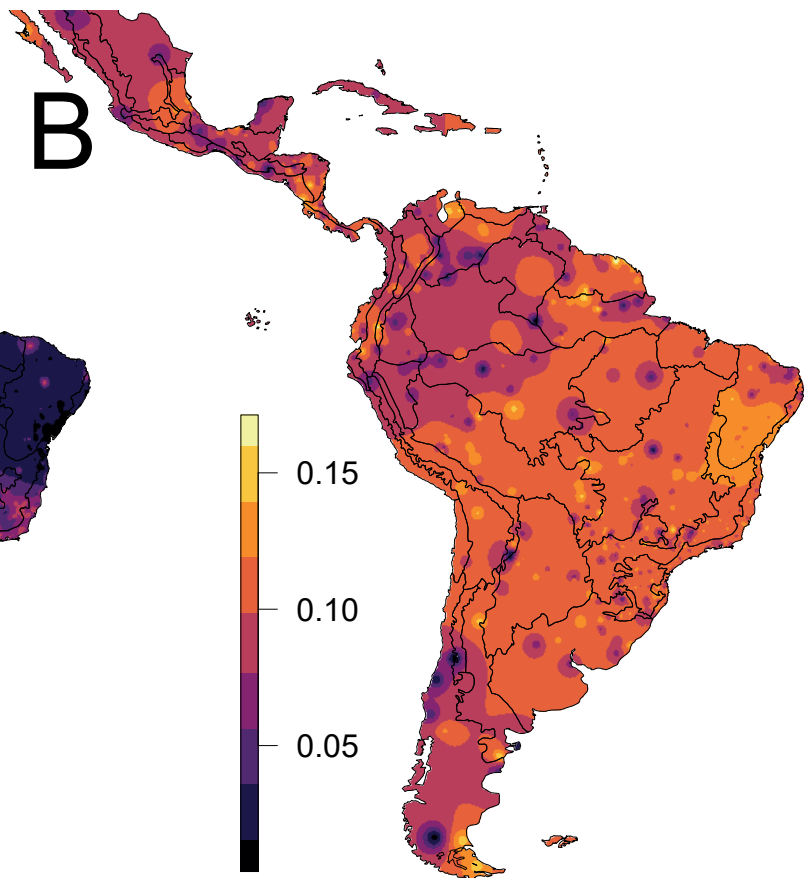

Pseudo-absence rates  
(defaunation bias correction)
